# Supplementary material for: Time to treatment benefit for adult patients with Fabry disease receiving agalsidase β: data from the Fabry Registry
Source: PubMed Central journal article supplement — J Med Genet. 2016 Mar 18;53(7):495–502. doi: 10.1136/jmedgenet-2015-103486 (PMC4941144; doi:10.1136/jmedgenet-2015-103486), 2016-03-18

**Supplementary Figure S1** Absolute number of patients experiencing first clinical event by time on agalsidase beta: male patients (A); and female patients (B). Note: the two columns near the vertical axis correspond to shorter time periods (6 months) than the other four columns (12 months).

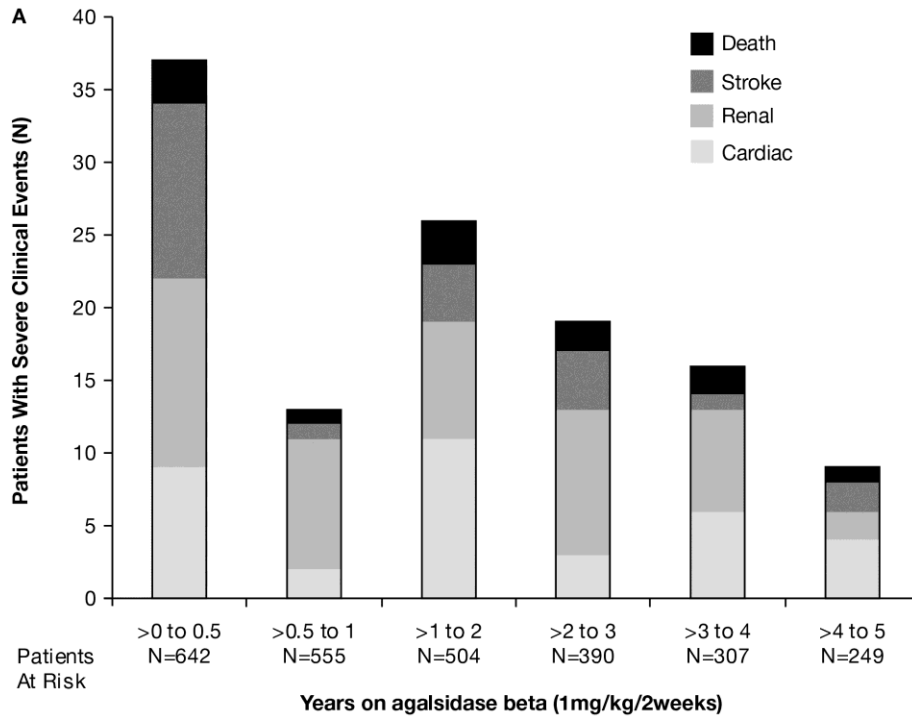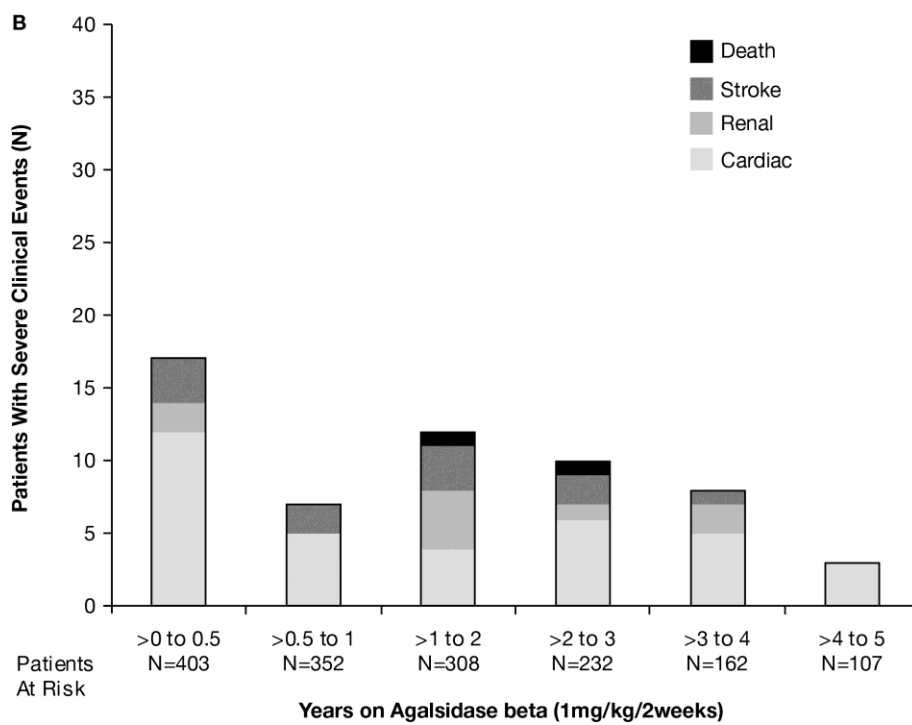

Supplement: jmedgenet-2015-103486supp_figure.pdf [file jmedgenet-2015-103486supp_figure.pdf]
