# Supplementary material for: Time to treatment benefit for adult patients with Fabry disease receiving agalsidase β: data from the Fabry Registry
Source: PubMed Central journal article supplement — J Med Genet. 2016 Mar 18;53(7):495–502. doi: 10.1136/jmedgenet-2015-103486 (PMC4941144; doi:10.1136/jmedgenet-2015-103486), 2016-03-18
Supplement: jmedgenet-2015-103486supp_tables.pdf [file jmedgenet-2015-103486supp_tables.pdf]

**Supplementary Table S1** Frequency of genotypes among the 1044 patients in the cohort

|                                 | <b>All</b>        | <b>Males</b>     | <b>Females</b>   |
|---------------------------------|-------------------|------------------|------------------|
|                                 | <b>(n = 1044)</b> | <b>(n = 641)</b> | <b>(n = 403)</b> |
| Mutation type, n (%)            | 765 (73)          | 456 (71)         | 309 (77)         |
| Nonsense                        | 147 (14)          | 83 (13)          | 64 (16)          |
| Missense                        | 439 (42)          | 260 (41)         | 179 (44)         |
| Splice site                     | 43 (4)            | 32 (5)           | 11 (3)           |
| Frameshift                      | 101 (10)          | 59 (9)           | 42 (10)          |
| Intronic                        | 4 (<1)            | 3 (<1)           | 1 (<1)           |
| Initiator codon                 | 3 (<1)            | 3 (<1)           | 0                |
| Small deletion (no frameshift)  | 17 (2)            | 10 (2)           | 7 (2)            |
| Small insertion (no frameshift) | 1 (<1)            | 0                | 1 (<1)           |
| Large deletion                  | 3 (<1)            | 3 (<1)           | 0                |
| Large duplication               | 0                 | 0                | 0                |
| Large insertion                 | 1 (<1)            | 0                | 1 (<1)           |
| Other                           | 6 (<1)            | 3 (<1)           | 3 (<1)           |
| Data not available              | 279 (27)          | 185 (29)         | 94 (23)          |

**Supplementary Table S2** Types of severe clinical events among the 1044 patients in the cohort

| <b>Severe events</b>                                                                           | <b>Total n (%)</b> |
|------------------------------------------------------------------------------------------------|--------------------|
| Severe events, n                                                                               | 177                |
| Renal events                                                                                   | 58 (33)            |
| Chronic dialysis (>40 days)                                                                    | 41 (23)            |
| Renal transplant                                                                               | 17 (10)            |
| Cardiovascular events                                                                          | 70 (40)            |
| Myocardial infarction                                                                          | 13 (7)             |
| First-time congestive heart failure                                                            | 11 (6)             |
| Atrial fibrillation                                                                            | 14 (8)             |
| Ventricular tachycardia                                                                        | 3 (2)              |
| Evidence of progressive heart disease<br>sufficiently severe to<br>require a cardiac procedure | 29 (16)            |
| Stroke                                                                                         | 35 (20)            |
| Death due to any cause                                                                         | 14 (8)             |

**Supplementary Table S3** Fabry-database.org mutation categories by pre-ERT event

| <b>Pre-ERT event</b> | <b>Patients with mutations associated with classic Fabry disease</b> | <b>Mutation classification absent, blank or missing</b> |
|----------------------|----------------------------------------------------------------------|---------------------------------------------------------|
| Pre-ERT event: yes   |                                                                      |                                                         |
| Patients, n          | 58                                                                   | 114                                                     |
| Severe events, n (%) | 12 (21)                                                              | 37 (32)                                                 |
| Pre-ERT event: no    |                                                                      |                                                         |
| Patients, n          | 342                                                                  | 530                                                     |
| Severe events, n (%) | 48 (14)                                                              | 80 (15)                                                 |

ERT, enzyme replacement therapy.
